# Supplementary material for: PET with Different Radiopharmaceuticals in Neuroendocrine Neoplasms: An Umbrella Review of Published Meta-Analyses
Source: MDPI journal article supplement (doi:10.3390/cancers13205172), 2021-10-15
Supplement: s1 [file s1]

# Supplementary Materials: PET with Different Radiopharmaceuticals in Neuroendocrine Neoplasms: An Umbrella Review of Published Meta-Analyses

**Table S1.** Quality assessment of the included meta-analyses.

| Study                   | PICO question                                                                                                                                                                                                                | Search strategy                                                                                                                              | Inclusion criteria                                                                                                                                                                                                                                                                                   | Quality assessment of included studies                                                                                                   | Heterogeneity and methods to address the heterogeneity                                                        | Publication bias evaluation                        |
|-------------------------|------------------------------------------------------------------------------------------------------------------------------------------------------------------------------------------------------------------------------|----------------------------------------------------------------------------------------------------------------------------------------------|------------------------------------------------------------------------------------------------------------------------------------------------------------------------------------------------------------------------------------------------------------------------------------------------------|------------------------------------------------------------------------------------------------------------------------------------------|---------------------------------------------------------------------------------------------------------------|----------------------------------------------------|
| Alevroudis et al. [8]   | Impact of <sup>18</sup> F-FDG PET status on disease control rate, progression-free survival (PFS), and overall survival (OS) in neuroendocrine tumors (NETs) patients receiving peptide receptor radionuclide therapy (PRRT) | Medline, Embase, Cochrane Library, and Web of Science databases for published and unpublished reports (conference abstracts) in any language | Retrospective and prospective single- and multi-center cohort studies on patients with NETs receiving PRRT. Disease control rate according to RECIST or SWOG criteria, PFS and OS following PRRT should be reported. Surgical series with a sample size of at least 10 NETs patients undergoing PRRT | The Newcastle-Ottawa scale (NOS) template was used for quality/risk of bias assessment                                                   | I <sup>2</sup> index was used. No method was used to address the cause of heterogeneity                       | Evaluated by funnel plots and Egger's test         |
| Barrio et al. [9]       | Impact of somatostatin receptor (SSTR) PET/CT on the management of patients with NETs                                                                                                                                        | It seems inadequate: only PubMed was searched. No data on language of articles                                                               | Original research and cohort studies reporting change in management after somatostatin receptor imaging; number of cases ≥ 10                                                                                                                                                                        | No quality assessment available                                                                                                          | I <sup>2</sup> index was used. Heterogeneity was further explored using subgroup analyses                     | No publication bias evaluation available           |
| Bauckneht et al. [10]   | Diagnostic performance of SSTR PET/CT for the detection of primary lesion and initial staging of pancreatic NETs                                                                                                             | PubMed, Scopus, Embase, and Google Scholar databases were searched. Only English language articles                                           | Diagnostic studies with a sample size > 10 cases and adequate diagnostic indices                                                                                                                                                                                                                     | QUADAS-2 was used for quality assessment                                                                                                 | I <sup>2</sup> index was used. No method to address the cause of heterogeneity                                | Funnel plots were used                             |
| Cheng et al. [11]       | Diagnostic performance of <sup>18</sup> F-FDG-PET and PET/CT for detection of recurrent or metastatic medullary thyroid carcinoma (MTC)                                                                                      | MEDLINE and EMBASE were searched. Only English language studies                                                                              | Diagnostic studies with a sample size > 6 cases and adequate diagnostic indices                                                                                                                                                                                                                      | Quality was evaluated for each included study                                                                                            | Only Cochrane Q test was reported. Subgroup analyses were used to address the heterogeneity cause             | No data available                                  |
| Christensen et al. [12] | Prognostic value of one or several <sup>18</sup> F-FDG PET parameters in patients with small cell lung cancer                                                                                                                | A search was performed in PubMed, Cochrane Library, and Embase. Only English language studies                                                | Studies of baseline or post treatment <sup>18</sup> F-FDG PET providing hazard ratio (HR) and 95% confidence intervals (95%CI) for PFS or OS or sufficient data to extract HR and 95%CI                                                                                                              | Quality in Prognostic Studies (QUIPS) tool was used. In the "study confounding" domain, the covariates stage, age, and sex were assessed | I <sup>2</sup> index and Cochrane Q value were used. No method was used to address the cause of heterogeneity | Funnel plots were used                             |
| De Dosso et al. [13]    | Detection rate (DR) of SSTR PET/CT in patients with metastatic NETs and unknown primary tumors (CUP)                                                                                                                         | PubMed/MEDLINE, EMBASE, and Cochrane library databases were searched. No language restriction                                                | Studies or subsets of studies investigating the DR of CUP by using SSTR PET/CT in patients with metastatic NET histologically proved; sample size > 10 cases                                                                                                                                         | QUADAS-2 was used                                                                                                                        | I <sup>2</sup> index and Cochrane Q values. Heterogeneity was further explored by subgroup analyses           | Funnel plots and Egger's test                      |
| Deppen et al. [14]      | <sup>68</sup> Ga-DOTATATE PET safety and efficacy compared to somatostatin receptor scintigraphy and conventional imaging for pulmonary and gastroenteropancreatic NETs                                                      | Medline, EMBASE, Web of Science and Cochrane Reviews electronic databases were searched. No language restriction                             | Primary trials or studies with >10 cases conducted to investigate diagnosis for pulmonary or gastroenteropancreatic NETs                                                                                                                                                                             | QUADAS                                                                                                                                   | I <sup>2</sup> index and Cochrane Q values. Heterogeneity was further explored by subgroup analyses           | Funnel plots and Deek's funnel plot asymmetry test |

|                    |                                                                                                                                                                  |                                                                                                                     |                                                                                                                                                            |                                                                                             |                                                                                                                                                                  |                                                     |
|--------------------|------------------------------------------------------------------------------------------------------------------------------------------------------------------|---------------------------------------------------------------------------------------------------------------------|------------------------------------------------------------------------------------------------------------------------------------------------------------|---------------------------------------------------------------------------------------------|------------------------------------------------------------------------------------------------------------------------------------------------------------------|-----------------------------------------------------|
| Geijer et al. [15] | Diagnostic accuracy of SSTR PET in patients with known or suspected NETs                                                                                         | The databases PubMed/MEDLINE and Embase were searched. Only limited to 1 November 2011 to 31 December 2012 (update) | Studies on SSTR PET or PET/CT performed in patients with NETs in the thorax or abdomen; and sample size of at least 8 patients.                            | QUADAS-2 modified by removing the question “If a threshold was used, was it pre-specified?” | I <sup>2</sup> index and Cochrane Q values. Threshold analysis using sROC. Sensitivity analysis was used to explore the heterogeneity                            | Funnel plots                                        |
| Han et al. [16]    | Performance of SSTR PET in the detection of pheochromocytomas and paragangliomas                                                                                 | PubMed and Embase databases without language restriction                                                            | Original articles with sample size larger than 5 cases of pheochromocytomas and paragangliomas assessed by SSTR PET                                        | QUADAS-2                                                                                    | I <sup>2</sup> test was used. Heterogeneity was explored by subgroup analyses and meta-regression                                                                | Funnel plot and Egger’s test                        |
| Han et al. [17]    | Prognostic value of <sup>18</sup> F-FDG PET for NETs                                                                                                             | PubMed and Embase databases without language restriction                                                            | Original articles reporting OS, PFS or other quantitative prognostic indices for <sup>18</sup> F-FDG PET in NETs                                           | Quality in Prognostic Studies tool                                                          | I <sup>2</sup> test was used. Heterogeneity was explored by subgroup analyses and meta-regression                                                                | Funnel plot, Egger’s test, and trim and fill method |
| Jiang et al. [18]  | Diagnostic accuracy and prediction efficiency of histological subtypes of <sup>18</sup> F-FDG and SSTR PET in primary pulmonary carcinoids                       | PubMed, EMBASE, and Web of Science without language or date limitation                                              | Original articles with enough data to extract sensitivity for <sup>18</sup> F-FDG or SSTR PET in pulmonary carcinoids                                      | QUADAS-2                                                                                    | I <sup>2</sup> index was used; sROC was used to explore threshold effect                                                                                         | No data available                                   |
| Kan et al. [19]    | Diagnostic performance of <sup>18</sup> F-FDG and SSTR PET in metastatic pheochromocytomas and paragangliomas                                                    | PubMed/MEDLINE, ScienceDirect and Web of Science without language or date limitation                                | No specific section in the study                                                                                                                           | QUADAS-2                                                                                    | I <sup>2</sup> index and Cochrane Q values. Threshold analysis using sROC. Subgroup analyses were done to explore the cause of heterogeneity                     | Deeks’ funnel plot asymmetry test                   |
| Lee et al. [20]    | Prognostic value of the maximum standardized uptake value (SUVmax) of SSTR PET in patients with NETs                                                             | PubMed, Scopus, Cochrane, and Embase were searched                                                                  | Studies that reported survival data regarding PFS and/or OS, and studies that included SUVmax of SSTR PET as a prognostic parameter in NETs                | A predefined quality assessment scale                                                       | I <sup>2</sup> index and Cochrane Q values. Subgroup analyses were done to explore the cause of heterogeneity                                                    | Funnel plots and Egger’s test                       |
| Lee et al. [21]    | Network meta-analysis (NMA) using direct comparison studies with 2 or more PET radiopharmaceuticals for detection of recurrent medullary thyroid carcinoma (MTC) | English-language literature searches of PubMed and EMBASE databases                                                 | Diagnostic tests on the PET or PET/CT imaging methods including 2 or more PET radiopharmaceuticals in the same subjects to compare the DR of recurrent MTC | QUADAS-2                                                                                    | I <sup>2</sup> index and Cochrane Q values. Subgroup analyses were done to explore the cause of heterogeneity                                                    | Funnel plots                                        |
| Li et al. [22]     | Diagnostic accuracy of PET(CT) in patients with neuroblastoma                                                                                                    | The Cochrane, PubMed, and Embase database were searched                                                             | Diagnostic studies on PET in neuroblastoma. The type of the radiotracer is not mentioned                                                                   | Nothing provided                                                                            | I <sup>2</sup> index and Cochrane Q values. Threshold analysis using sROC. Subgroup analyses were done to explore the cause of heterogeneity                     | Deeks’ funnel asymmetry plot                        |
| Liu et al. [23]    | To compare the diagnostic value of SSTR and <sup>18</sup> F-FDG PET or PET/CT in NETs                                                                            | MEDLINE, PubMed, Embase and Cochrane Library databases for English-language articles                                | Diagnostic studies on SSTR or <sup>18</sup> F-FDG PET in NETs if provided enough data to calculate diagnostic indices                                      | QUADAS-2                                                                                    | I <sup>2</sup> index and Cochrane Q values. Threshold analysis using sROC. Subgroup analyses and meta-regression were done to explore the cause of heterogeneity | Funnel plots and Egger’s test                       |
| Lu et al. [24]     | Diagnostic accuracy of <sup>18</sup> F-FDG PET or PET/CT in                                                                                                      | PubMed/MEDLINE and EMBASE                                                                                           | Diagnostic studies on <sup>18</sup> F-FDG PET in SCLC with enough                                                                                          | A predefined checklist was                                                                  | I <sup>2</sup> index and Cochrane Q values.                                                                                                                      | No data                                             |

|                      |                                                                                                           |                                                                                         |                                                                                                                                                                                                                                                                                                                                  |                                      |                                                                                                                                                                   |                                        |
|----------------------|-----------------------------------------------------------------------------------------------------------|-----------------------------------------------------------------------------------------|----------------------------------------------------------------------------------------------------------------------------------------------------------------------------------------------------------------------------------------------------------------------------------------------------------------------------------|--------------------------------------|-------------------------------------------------------------------------------------------------------------------------------------------------------------------|----------------------------------------|
|                      | the pretherapeutic staging of patients with small-cell lung cancer (SCLC)                                 | with no language restriction                                                            | data to calculate diagnostic indices                                                                                                                                                                                                                                                                                             | used for quality assessment          | Threshold analysis using sROC. No method was used to further explore the heterogeneity                                                                            |                                        |
| Ma et al. [25]       | Diagnostic accuracy of SSTR PET for carcinoma unknown primary (CUP) NETs                                  | PubMed/MEDLINE and ScienceDirect with no language restriction                           | Diagnostic studies on accuracy of SSTR PET for carcinoma unknown primary (CUP) NETs                                                                                                                                                                                                                                              | QUADAS-2                             | I <sup>2</sup> index and Cochrane Q values. Threshold analysis using sROC. Sub-group analyses and meta-regression were done to explore the cause of heterogeneity | Deeks' asymmetry test and funnel plots |
| Martucci et al. [26] | Impact of <sup>18</sup> F-FDG PET/CT in staging SCLC                                                      | PubMed/MEDLINE, EMBASE, and Cochrane library with no language restriction               | All original studies in which the main outcome was the change of binary SCLC staging using <sup>18</sup> F-FDG PET/CT or reported the diagnostic accuracy of <sup>18</sup> F-FDG PET/CT staging compared to conventional staging in SCLC and the impact of <sup>18</sup> F-FDG PET/CT staging on survival of SCLC patients       | QUADAS-2                             | I <sup>2</sup> index was used; no method was used to explore the cause of heterogeneity                                                                           | Egger's test                           |
| Nie et al. [27]      | Prognostic importance of metabolic parameters (SUV, MTV) of <sup>18</sup> F-FDG PET in SCLC               | MEDLINE, EMBASE, and Cochrane Library databases with English language studies only      | Studies limited to SCLC patients who underwent pre-treatment <sup>18</sup> F-FDG PET/CT and that was used as an initial imaging tool; MTV and/or TLG measurement of patients with SCLC; all patients received chemotherapy and/or radiotherapy; and articles that reported data relating to the impact of MTV or TLG on survival | Not reported                         | Cochrane's test and the I <sup>2</sup> statistic was used; sensitivity analysis was used to explore the cause of heterogeneity                                    | Not reported                           |
| Piccardo et al. [28] | Head-to-head comparison between <sup>18</sup> F-FDOPA PET/CT and SSTR PET/CT in detecting intestinal NETs | PubMed, CENTRAL, Scopus and Web of Science, Embase were searched                        | Studies reporting a head-to-head comparison of <sup>18</sup> F-FDOPA PET/CT and SSTR PET/CT in intestinal NETs patients                                                                                                                                                                                                          | QUADAS-2                             | I <sup>2</sup> index was used. Threshold analysis using sROC. Sub-group analyses were done to explore the cause of heterogeneity                                  | Egger's test                           |
| Rufini et al. [29]   | Diagnostic accuracy of <sup>18</sup> F-FDOPA PET and PET/CT in patients with NETs                         | PubMed/ MEDLINE, Embase and Scopus databases were search with no date or language limit | Studies with enough sample size (the exact number was not reported) on diagnostic accuracy of <sup>18</sup> F-FDOPA PET and PET/CT in NETs. Only studies with enough data to calculate diagnostic indices were included.                                                                                                         | QUADAS-2                             | I <sup>2</sup> index was used. Threshold analysis using sROC. No other method was used to explore the reason of heterogeneity                                     | Not reported                           |
| Shah et al. [30]     | Diagnostic accuracy of Exendin-4 based PET/CT or SPECT/CT for insulinoma                                  | Only PubMed and English language studies were searched                                  | All studies on Exendin-4-based imaging for detecting insulinoma                                                                                                                                                                                                                                                                  | Not reported                         | No true meta-analysis was done. Nothing on heterogeneity was reported                                                                                             | Not reported                           |
| Singh et al. [31]    | To compare the role of SSTR PET or PET/CT in NETs with conventional imaging                               | MEDLINE, EMBASE, and Cochrane Database of Systematic Reviews databases were searched.   | Studies comparing SSTR PET or PET/CT with conventional imaging in the initial diagnosis, staging and restaging, assessment of treatment response, and routine surveillance of NETs                                                                                                                                               | QUADAS-2 only for diagnostic studies | I <sup>2</sup> index was used. Threshold analysis using sROC and bivariate meta-analysis. No other method was used                                                | Not reported                           |

| Only English studies were included |                                                                                                                        |                                                                                                    | to explore the reason of heterogeneity                                                                                                                                                                                                                              |                                                                                     |                                                                                                                                                                          |
|------------------------------------|------------------------------------------------------------------------------------------------------------------------|----------------------------------------------------------------------------------------------------|---------------------------------------------------------------------------------------------------------------------------------------------------------------------------------------------------------------------------------------------------------------------|-------------------------------------------------------------------------------------|--------------------------------------------------------------------------------------------------------------------------------------------------------------------------|
| Studies included:                  |                                                                                                                        |                                                                                                    |                                                                                                                                                                                                                                                                     |                                                                                     |                                                                                                                                                                          |
| Sun et al. [32]                    | Diagnostic performance of <sup>18</sup> F-FDG PET in bone-marrow involvement in pediatric neuroblastoma                | PubMed and Embase were searched without any date or language restriction                           | (1) The main topic was the diagnostic accuracy of <sup>18</sup> F-FDG PET/CT in the detection of bone or bone marrow involvement in pediatric NB patients; (2) Bone marrow biopsy as the gold standard; (3) sufficient data to reassess sensitivity and specificity | QUADAS-2                                                                            | I <sup>2</sup> index was used. Threshold analysis using sROC. Subgroup analyses were done to explore the cause of heterogeneity<br><br>Deeks' funnel plot asymmetry test |
| Treglia et al. [33]                | Diagnostic performance of <sup>18</sup> F-FDOPA PET or PET/CT in detecting recurrent medullary thyroid carcinoma (MTC) | PubMed/MEDLINE, Scopus, and Embase databases were searched. No language restriction                | Studies or subsets in studies investigating the diagnostic performance of <sup>18</sup> F-FDOPA PET or PET/CT in patients with suspected recurrent MTC. Small sample studies were excluded (no number was reported)                                                 | QUADAS                                                                              | I <sup>2</sup> index was used. Subgroup analyses were used to explore the reason of heterogeneity<br><br>Not reported                                                    |
| Treglia et al. [34]                | Diagnostic performance of SSRT PET or PET/CT in patients with thoracic and/or gastroenteropancreatic (GEP) NETs        | PubMed/MEDLINE, Scopus and Embase databases were searched without any date or language restriction | Diagnostic studies on SSRT PET or PET/CT in patients with thoracic and/or GEP NETs were eligible for inclusion (sample size > 8 cases)                                                                                                                              | QUADAS                                                                              | I <sup>2</sup> index was used. Threshold analysis using sROC. Subgroup analyses were done to explore the cause of heterogeneity<br><br>Not reported                      |
| Treglia et al. [35]                | Diagnostic performance of <sup>18</sup> F-FDOPA PET in patients with paraganglioma                                     | PubMed/MEDLINE, Scopus and Embase databases were searched without any date or language restriction | Studies or subsets in studies investigating the diagnostic performance of <sup>18</sup> F-FDOPA PET or PET/CT in patients with paraganglioma. Small sample studies were excluded (no number was reported)                                                           | QUADAS                                                                              | I <sup>2</sup> index was used. Threshold analysis using sROC. Subgroup analyses were done to explore the cause of heterogeneity<br><br>Not reported                      |
| Treglia et al. [36]                | Diagnostic performance of <sup>18</sup> F-FDG PET and PET/CT in detecting recurrent medullary thyroid carcinoma (MTC)  | PubMed/MEDLINE, Scopus and Embase databases were searched without any date or language restriction | Studies or subsets in studies investigating the diagnostic performance of <sup>18</sup> F-FDG PET or PET/CT in patients with recurrent/residual MTC were eligible for inclusion (sample size > 6 cases)                                                             | QUADAS                                                                              | I <sup>2</sup> index was used. Subgroup analyses were done to explore the cause of heterogeneity<br><br>Not reported                                                     |
| Treglia et al. [37]                | Diagnostic accuracy of <sup>18</sup> F-FDG PET in Merkel cell carcinoma (MCC)                                          | PubMed/MEDLINE, Scopus databases were searched without any date or language restriction            | Studies or subsets in studies investigating the usefulness of <sup>18</sup> F-FDG PET or PET/CT in patients with MCC. Small sample studies were excluded (no number was reported)                                                                                   | The 2011 Oxford Centre for Evidence-Based Medicine checklist for diagnostic studies | I <sup>2</sup> index was used. Threshold analysis using sROC. Subgroup analyses were done to explore the cause of heterogeneity<br><br>Funnel plots and Egger's test.    |
| Treglia et al. [38]                | Detection rate of SSRT PET in patients with recurrent MTC                                                              | PubMed/MEDLINE and Cochrane Library Databases were searched without date or language restriction   | Studies or subsets in studies investigating the diagnostic performance of SSRT PET in patients with recurrent MTC. Case reports were excluded (no number was reported regarding sample size)                                                                        | The 2011 Oxford Centre for Evidence-Based Medicine checklist for diagnostic studies | I <sup>2</sup> index was used. Subgroup analyses were done to explore the cause of heterogeneity<br><br>Not reported                                                     |
| Xia et al. [39]                    | Comparison of diagnosing and staging accuracy of PET/CT and MIBG on patients with neuroblastoma (NB)                   | MEDLINE, EMBASE, Cochrane Library and CNKI databases without time limitation                       | Studies evaluating the performance of MIBG or PET/CT or both for examining neuroblastoma (sample size > 5 cases)                                                                                                                                                    | QUADAS-2                                                                            | Cochrane Q test was used. Threshold analysis using sROC. Subgroup analyses were done to explore the cause of heterogeneity<br><br>Funnel plots were used                 |

|                     |                                                                                                          |                                                                                                        |                                                                                                                                                                                                                                                                                                                                                                                              |                                        |                                                                                                                        |                                     |
|---------------------|----------------------------------------------------------------------------------------------------------|--------------------------------------------------------------------------------------------------------|----------------------------------------------------------------------------------------------------------------------------------------------------------------------------------------------------------------------------------------------------------------------------------------------------------------------------------------------------------------------------------------------|----------------------------------------|------------------------------------------------------------------------------------------------------------------------|-------------------------------------|
| Yang et al.<br>[40] | Diagnostic role of $^{68}\text{Ga}$ -DOTATOC and $^{68}\text{Ga}$ -DOTATATE PET in the diagnosis of NETs | Pubmed, Embase, and Scopus databases were searched only for English language studies                   | Papers investigating the diagnostic role of $^{68}\text{Ga}$ -DOTATOC and $^{68}\text{Ga}$ -DOTATATE PET in patients with NETs. Small sample studies were excluded (no number was reported)                                                                                                                                                                                                  | QUADAS                                 | $I^2$ index was used. Threshold analysis using sROC. Subgroup analyses were done to explore the cause of heterogeneity | Not reported                        |
| Zhu et al.<br>[41]  | Prognostic value of $^{18}\text{F}$ -FDG PET SUVmax of pretreatment primary lesions in SCLC              | PubMed, EMBASE, the Cochrane library, and Web of Science were searched. Only English language studies. | (i) patients were histopathologically diagnosed with SCLC; (ii) the study was identified as a case-control or cohort study; (iii) at least one $^{18}\text{F}$ -FDG-PET/CT was performed before treatments, including chemotherapy, surgical therapy, and/or radiotherapy; (iv) at least one relevant prognostic factor was assessed, such as OS, PFS (v) hazard ratios (HRs) were available | Newcastle–Ottawa scale (NOS) checklist | Cochrane Q value and $I^2$ index were used. Subgroup analyses were done to explore the cause of heterogeneity          | Begg's funnel test and Egger's test |



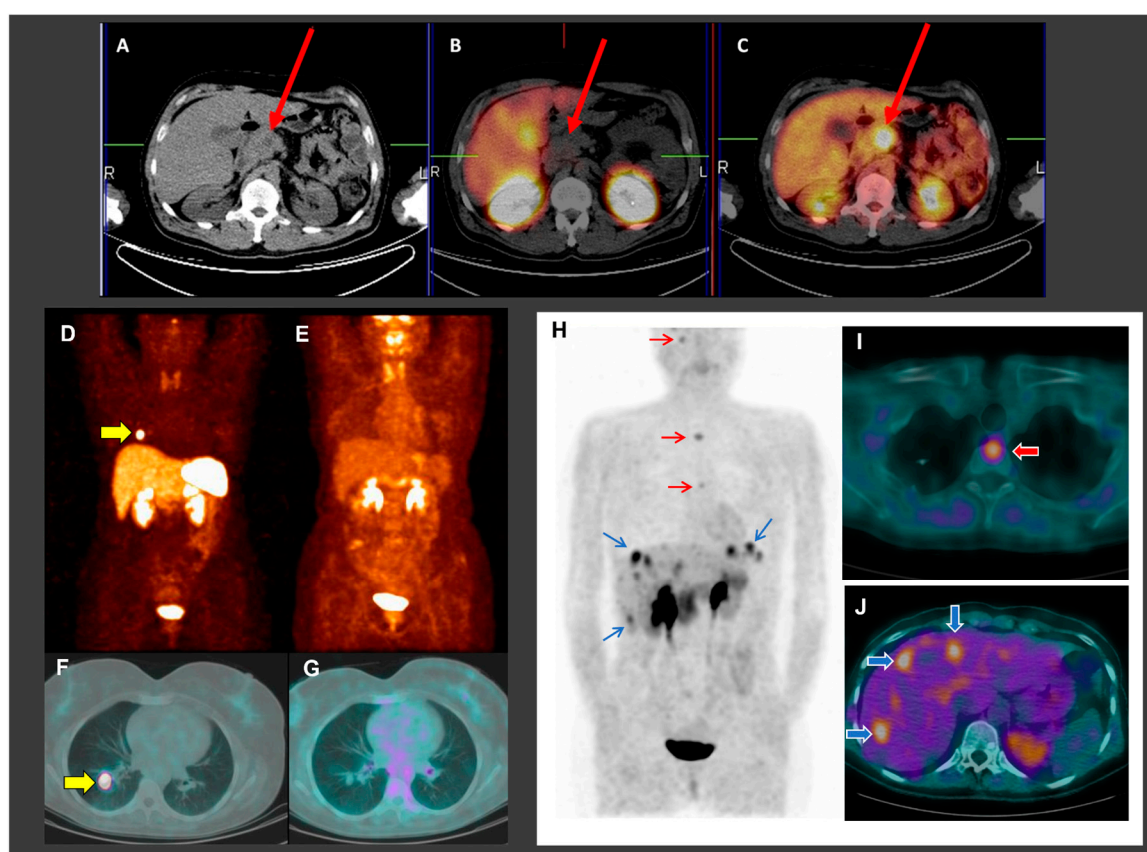

**Figure S1.** Case examples of the application of PET with different radiopharmaceuticals to detect neuroendocrine neoplasms. Axial computed tomography (CT) (A), hybrid somatostatin receptor imaging/CT (B) and fluorine-18 fluorodeoxyglucose positron emission tomography/CT ( $^{18}\text{F}$ -FDG PET/CT) (C) in a patient with high grade pancreatic neuroendocrine tumor (NET) showing increased  $^{18}\text{F}$ -FDG uptake (increased glucose metabolism) and low uptake of radiolabeled somatostatin analogues (reduced expression of somatostatin receptors) due to its aggressive behavior. Somatostatin receptor PET (D),  $^{18}\text{F}$ -FDG PET (E), axial somatostatin receptor PET/CT (F) and axial  $^{18}\text{F}$ -FDG PET/CT images (G) in a patient with well-differentiated thoracic NET (typical bronchial carcinoid) showing increased uptake of radiolabeled somatostatin analogues (yellow arrows) due to increased somatostatin receptor expression and reduced  $^{18}\text{F}$ -FDG uptake due to reduced glucose metabolism.  $^{18}\text{F}$ -FDOPA PET (H) and axial  $^{18}\text{F}$ -FDOPA PET/CT images (I,J) showing bone metastases (red arrows) and liver metastases (blue arrows) with increased radiopharmaceutical uptake in a patient with recurrent medullary thyroid carcinoma (with increased serum calcitonin levels).
